# Supplementary material for: A facile electrochemical strategy for engineering sulfur deficiencies of CdS nanosheets to promote the catalytic conversion of polysulfides for lithium–sulfur batteries
Source: Royal Society of Chemistry journal article supplement (doi:10.1039/d0se01283a), 2020-12-09
Supplement: d0se01283a1.pdf [file d0se01283a1.pdf]

## Supporting Information

### **A facile electrochemical strategy for engineering the sulfur deficiencies of CdS Nanosheets to promote catalytic conversion of polysulfides for lithium sulfur batteries**

Yangping Li,<sup>a</sup> Dongfang Niu,<sup>a\*</sup> Xingyan Fu,<sup>a</sup> Zhiliang Zhang,<sup>a</sup> and Xinsheng Zhang<sup>a\*</sup>

<sup>a</sup> State Key Laboratory of Chemical Engineering, School of Chemical Engineering, East China University of Science and Technology, Shanghai 200237, China.

\*Corresponding author. Email address: [dfniu@ecust.edu.cn](mailto:dfniu@ecust.edu.cn), [xs Zhang@ecust.edu.cn](mailto:xs Zhang@ecust.edu.cn)

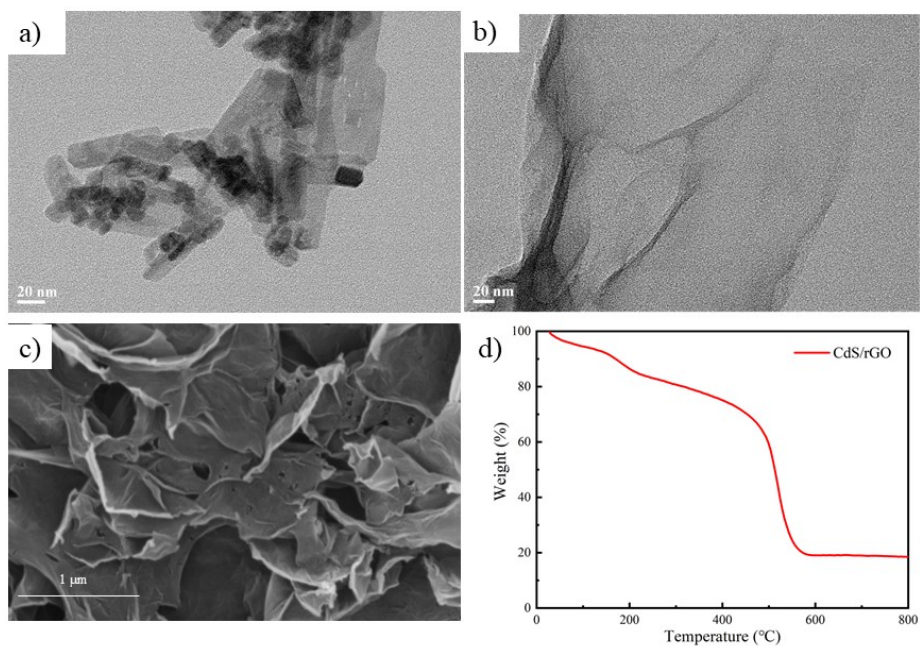

Fig. S1. a) TEM image of CdS NSs. TEM b) and SEM c) images of a thin GO film. d) TGA curve of CdS NSs/rGO composite in air.

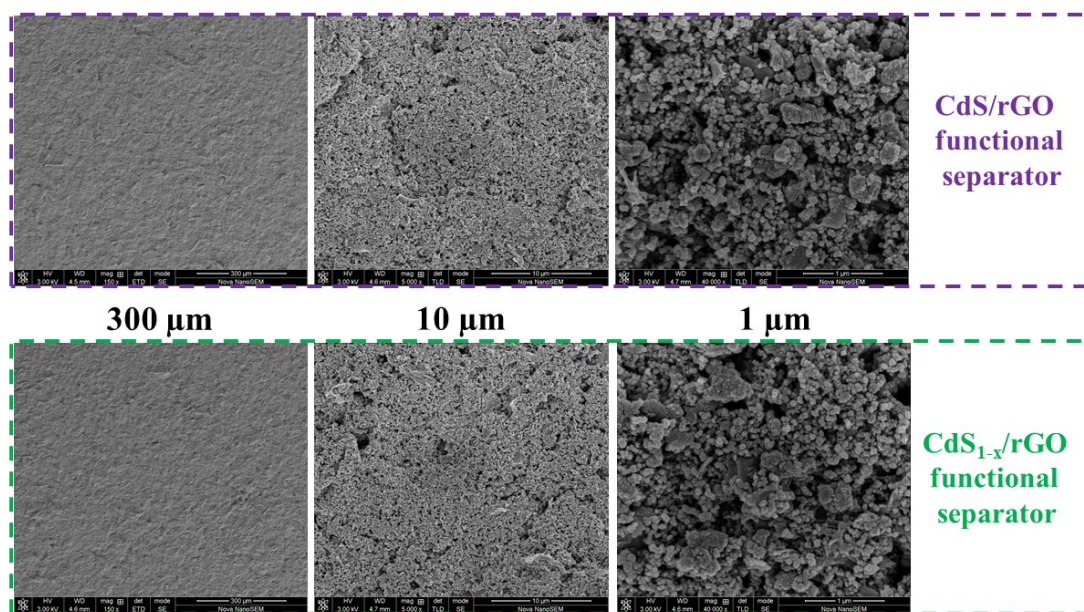

Fig. S2. SEM images of the CdS<sub>1-x</sub> NSs/rGO and CdS NSs/rGO functional separators.

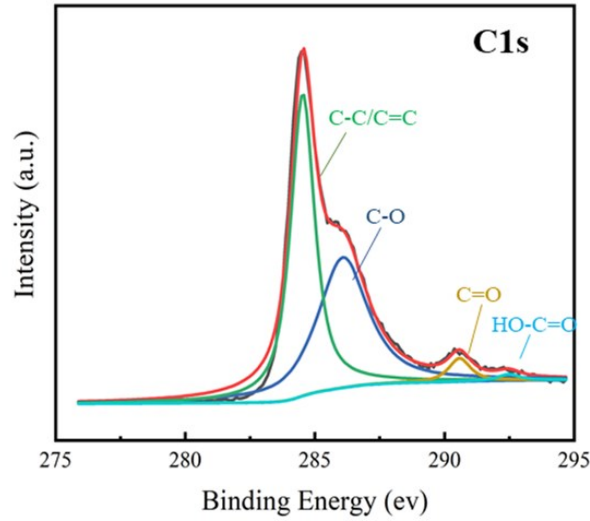

Fig. S3. C 1s XPS spectrum of the  $\text{CdS}_{1-x}$  NSs/rGO functional separator.

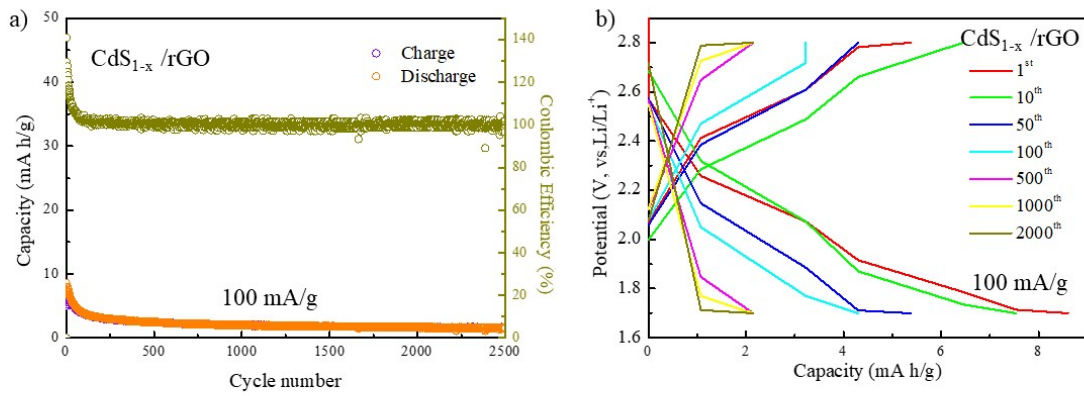

Fig. S4. The intrinsic lithium storage performance of  $\text{CdS}_{1-x}$  NSs/rGO.

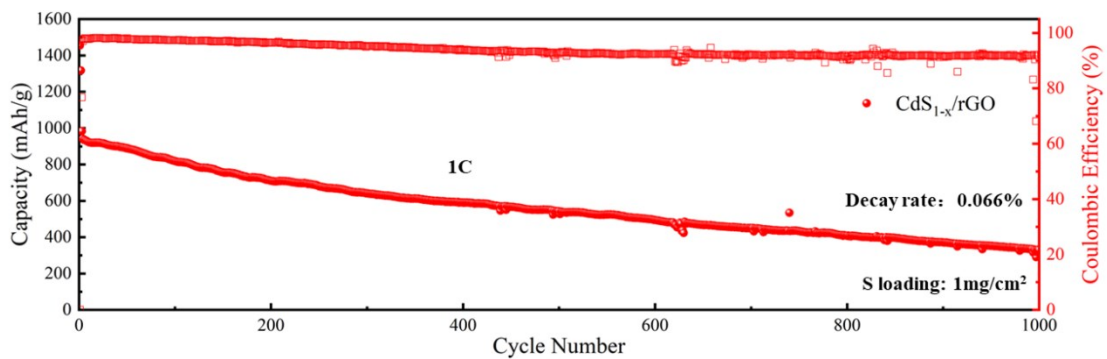

Fig. S5. Cycling performance of the  $\text{CdS}_{1-x}$  NSs/rGO functional separator with  $1 \text{ mg/cm}^2$  S loading at 1C.

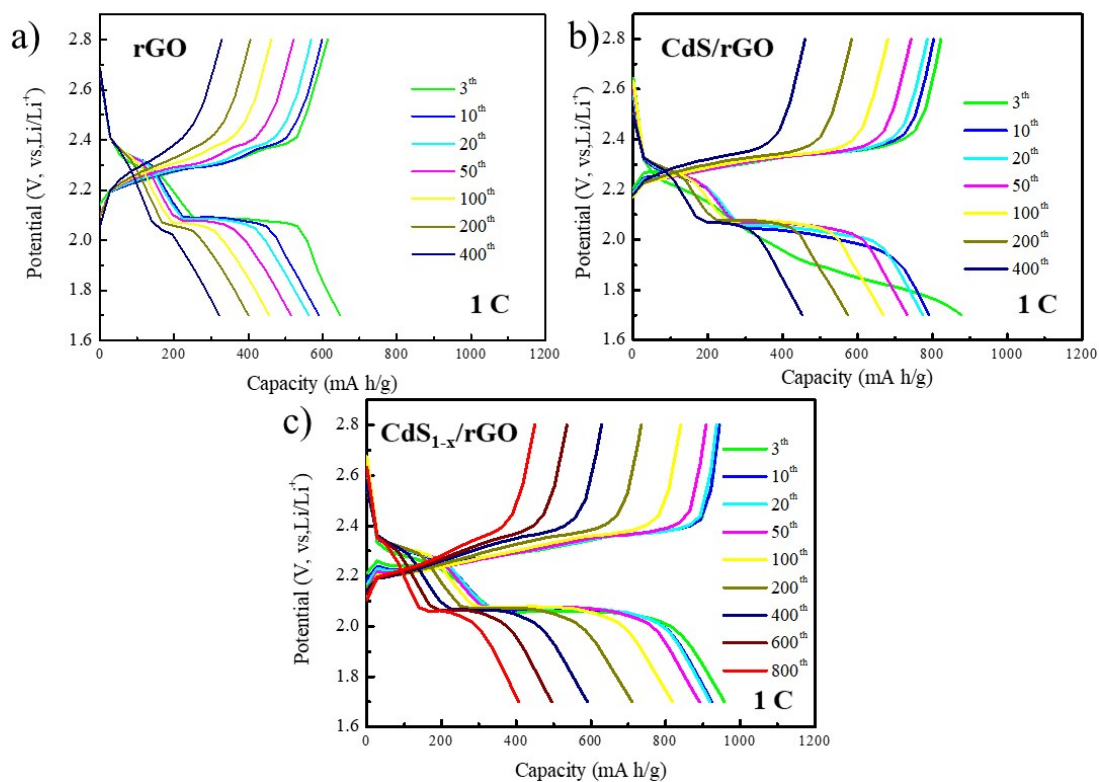

Fig. S6. The discharge/charge curves of the cells with the rGO, CdS NSs/rGO, and CdS<sub>1-x</sub> NSs/rGO functional separators at 1 C.

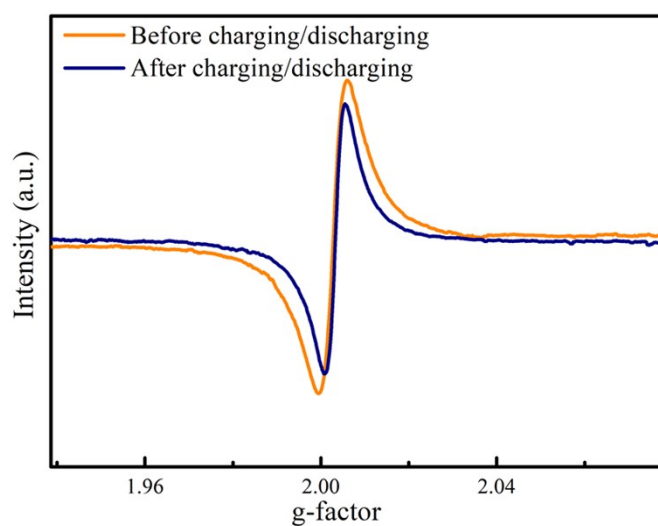

Fig. S7. EPR patterns of the cells with the CdS<sub>1-x</sub> NSs/rGO functional separator before and after repeated charging/discharging.

Table S1 Comparison of catalysts with deficiencies reported to date for Li-S batteries

| Catalysts                                  | Rate performance | Initial capacity/Capacity decay (%)            | Methods for fabricating deficiencies                  | References |
|--------------------------------------------|------------------|------------------------------------------------|-------------------------------------------------------|------------|
| MoS <sub>2-x</sub> /HMC                    | 730 mA h/g (2 C) | /                                              | Annealing in H <sub>2</sub> /Ar                       | 1          |
| MoS <sub>2-x</sub> /rGO                    | 826 mA h/g (8 C) | 1159.9 mA h/g / 0.33 after 100 cycles at 0.2 C | Annealing in H <sub>2</sub> /Ar                       | 2          |
| CNT@TiO <sub>2-x</sub>                     | 597 mA h/g (2 C) | 1149 mA h/g / 0.33 after 100 cycles at 1 C     | Annealing in H <sub>2</sub> /Ar                       | 3          |
| NiCo <sub>2</sub> O <sub>4-x</sub>         | 855 mA h/g (5 C) | 1221 mA h/g / 0.045 after 800 cycles at 0.2 C  | Hydrothermal followed by annealing in air             | 4          |
| O <sub>2</sub> plasma treated PP separator | /                | 1028 mA h/g / 0.49 after 105 cycles at 0.2 C   | O <sub>2</sub> plasma treatment                       | 5          |
| TiS <sub>2-x</sub>                         | 807 mA h/g (2 C) | 956 mA h/g / 0.04 after 1000 cycles at 1 C     | Vacuum heat treatment                                 | 6          |
| Ti <sub>1-x</sub> O <sub>2</sub>           | 746 mA h/g (2 C) | 656 mA h/g / 0.025 after 500 cycles at 1 C     | Solvothermal reaction followed by thermal calcination | 7          |
| Fe/Co <sub>3</sub> O <sub>4</sub>          | 783 mA h/g (2 C) | 902 mA h/g / 0.017 after 1000 cycles at 1 C    | Hydrothermal reaction followed by thermal calcination | 8          |
| SnS <sub>2</sub> /TiO <sub>2</sub>         | 449 mA h/g (2 C) | 841 mA h/g / 0.064 after 500 cycles at 0.5 C   | Hydrothermal reaction                                 | 9          |
| Co <sub>3</sub> S <sub>4-x</sub>           | 634mA h/g (2 C)  | 750 mA h/g / 0.017after 400 cycles at 1 C      | Hydrothermal reaction                                 | 10         |
| TiO <sub>2</sub> -Ar                       | 571 mA h/g (2 C) | 911 mA h/g / 0.082 after 500 cycles at 1 C     | Annealing in Ar                                       | 11         |
| Co <sub>5.47</sub> N <sub>x</sub> -C       | 640 mA h/g (2 C) | 708 mA h/g / 0.04 after 1000 cycles at 2 C     | Thermal calcination in NH <sub>3</sub>                | 12         |
| CdS <sub>1-x</sub> NSs/rGO                 | 837 mA h/g (2 C) | 983 mA h/g / 0.089 after 500 cycles at 1 C     | Electroreduction treatment                            | This Work  |

---

## References

- 1 H. G. Wang, X. C. Li, N. Qin, X. Zhao, H. Cheng, G. Z. Cao and W. J. Zhang, *J. Mater. Chem. A.*, 2019, **7**, 12068-12074.
- 2 H. B. Lin, L. Q. Yang, X. Jiang, G. C. Li, T. R. Zhang, Q. F. Yao, G. Wesley Zheng and J. Yang Lee, *Energy Environ. Sci.*, 2017, **10**, 1476-1486.
- 3 Y. K. Wang, R. F. Zhang, J. Chen, H. Wu, S. Y. Lu, K. Wang, H. L. Li, C. Harris, K. Xi, R. V Kumar and S. J. Ding, *Adv. Energy Mater.*, 2019, **9**, 1900953.
- 4 D. Luo, G. R. Li, Y. P. Deng, Z. Zhang, J. D. Li, R. L. Liang, M. Li, Y. Jiang, W. W. Zhang, Y. S. Liu, W. Lei, A. P. Yu and Z. W. Chen, *Adv. Energy Mater.*, 2019, **9**, 1900228.
- 5 Z. Li, Q. Q. Jiang, Z. L. Ma, Q. H. Liu, Z. J. Wu and S. Y. Wang, *RSC. Adv.*, 2015, **5**, 79473-79478.
- 6 Y. Y. Zhao, W. L. Cai, Y. T. Fang, H. S. Ao, Y. C. Zhu and Y. T. Qian, *ChemElectroChem*, 2019, **6**, 2231-2237.
- 7 J. B. Yang, L. Y. Xu, S. Z. Li, C. Peng, *Nanoscale*, 2020, **12**, 4645-4654.
- 8 W. J. Wang, Y. Zhao, Y. G. Zhang, J. Y. Wang, G. L. Cui, M. J. Li, Z. Bakenov and X. Wang, *ACS Appl. Mater. Interfaces*, 2020, **12**, 12763-12773.
- 9 X. C. Li, G. L. Guo, N. Qin, Z. Deng, Z. G. Lu, D. Shen, X. Zhao, Y. Li, B. L. Su and H. G. Wang, *Nanoscale*, 2018, **10**, 15505-15512.
- 10 J. Zhao, D. K. Zhao, L. G. Li, L. Zhou, X. H. Liang, Z. X. Wu and Z. J. Jiang, *J. Phys. Chem. C*, 2020, **124**, 12259-12268.
- 11 H. G. Wang, K. L. Yin, N. Qin, X. Zhao, F. J. Xia, Z. Y. Hu, G. L. Guo, G. Z. Cao and W. J. Zhang, *J. Mater. Chem. A.*, 2019, **7**, 10346-10353.
- 12 H. Wu, H. Jiang, Y. Q. Yang, C. Y. Hou, H. T. Zhao, R. Xiao and H. Z. Wang, *J. Mater. Chem. A.*, 2020, **8**, 14498-14505.
